# Supplementary material for: Determination and separation of putrescine and spermidine in aquatic products
Source: Royal Society of Chemistry journal article supplement (doi:10.1039/c5ay03130c), 2016-01-01
Supplement: c5ay03130c1.pdf [file c5ay03130c1.pdf]

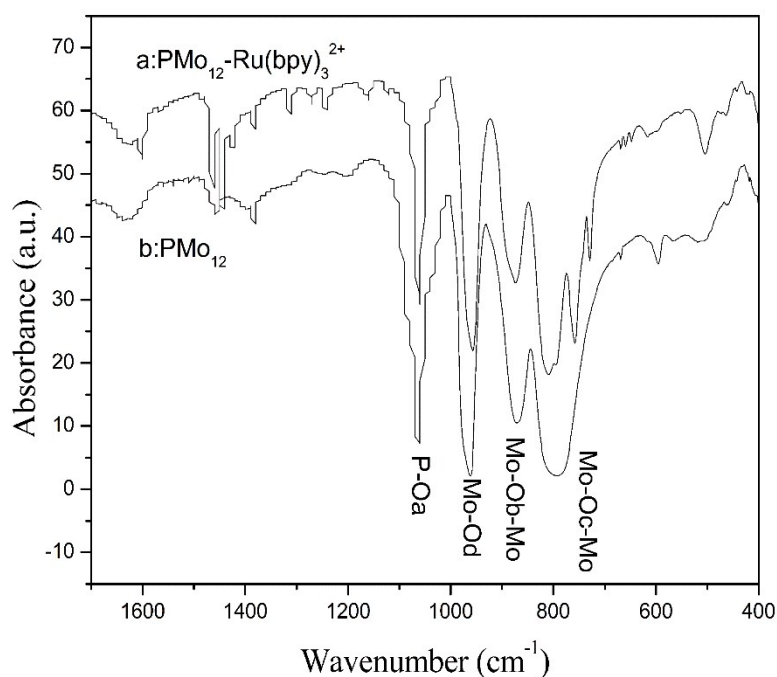

FTIR spectra of  $\text{PMo}_{12}\text{-Ru(bpy)}_3^{2+}$  (curve a) and  $\text{PMo}_{12}$  (curve b)

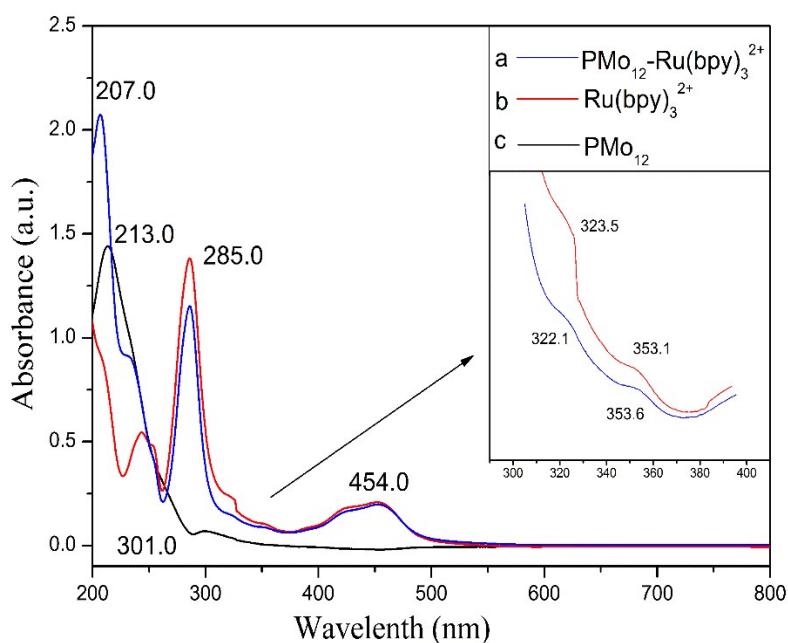

UV-vis absorbance spectra of free  $\text{PMo}_{12}\text{-Ru(bpy)}_3^{2+}$  (curve a),  $\text{Ru(bpy)}_3^{2+}$  (curve b) and  $\text{PMo}_{12}$  (curve c) in aqueous solution
